# Supplementary material for: Association between fast eating speed and metabolic dysfunction-associated steatotic liver disease: a multicenter cross-sectional study and meta-analysis
Source: PubMed Central journal article supplement (PMC11324733; doi:10.1038/s41387-024-00326-x), 2024-08-14
Supplement: 41387_2024_326_MOESM1_ESM.pdf [file 41387_2024_326_MOESM1_ESM.pdf]

**Association between fast eating speed and metabolic dysfunction-associated  
steatotic liver disease: A multicenter cross-sectional study and meta-analysis**

**SUPPLEMENTARY TABLES**

**Table S1. Participants characteristics by MASLD status**

| Characteristics <sup>a</sup> | Total(n=1965)           | Controls<br>(n=1006)    | MASLD<br>(n=959)        | P-<br>value <sup>b</sup> |
|------------------------------|-------------------------|-------------------------|-------------------------|--------------------------|
| Women, n(%)                  | 988 (50.3)              | 543 (54.0)              | 445 (46.4)              | 0.001                    |
| Age, yr                      | 52.78 ±13.65            | 52.34 ±14.46            | 53.25 ±12.72            | 0.143                    |
| Smoker, n(%)                 | 542 (27.6)              | 294 (29.2)              | 248 (25.9)              | 0.106                    |
| Alcohol-drinker, n(%)        | 446 (22.7)              | 221 (22.0)              | 225 (23.5)              | 0.462                    |
| Glucose metabolism,<br>n(%)  |                         |                         |                         | <0.001                   |
| NGT                          | 494 (25.1)              | 354 (35.2)              | 140 (14.6)              |                          |
| IGR                          | 283 (14.4)              | 133 (13.2)              | 150 (15.6)              |                          |
| T2DM                         | 1188 (60.5)             | 519 (51.6)              | 669 (69.8)              |                          |
| North, n(%)                  | 896 (45.6)              | 396 (39.4)              | 500 (52.1)              | <0.001                   |
| BMI, kg/m <sup>2</sup>       | 24.80 ±3.61             | 23.51 ±3.16             | 26.14 ±3.57             | <0.001                   |
| SBP, mmHg                    | 130.25 ±19.64           | 127.97 ±20.84           | 132.64 ±18.01           | <0.001                   |
| DBP, mmHg                    | 80.40 ±11.27            | 78.53 ±10.96            | 82.37 ±11.27            | <0.001                   |
| WC, cm                       | 87.93 ±10.76            | 91.19 ±10.08            | 84.83 ±10.46            | 0.001                    |
| HBA1C, %                     | 6.90 (5.80- 9.00)       | 6.40 (5.60-<br>8.30)    | 7.50 (6.10-<br>9.35)    | <0.001                   |
| FBG, mmol/L                  | 6.11 (5.26- 7.90)       | 5.60 (5.10-<br>7.34)    | 6.60 (5.50-<br>8.60)    | <0.001                   |
| 2hPBG, mmol/L                | 11.42 (7.03-<br>16.60)  | 9.09 (6.39-<br>15.50)   | 13.27 (8.60-<br>17.50)  | <0.001                   |
| TC, mmol/L                   | 4.91 ±1.28              | 4.74 ±1.26              | 5.09 ±1.28              | <0.001                   |
| TG, mmol/L                   | 2.04 ±2.22              | 1.53 ±1.36              | 2.57 ±2.75              | <0.001                   |
| HDL-c, mmol/L                | 1.24 ±0.40              | 1.30 ±0.42              | 1.17 ±0.36              | <0.001                   |
| LDL-C, mmol/L                | 2.85 ±0.95              | 2.75 ±0.94              | 2.94 ±0.95              | <0.001                   |
| ALT, U/L                     | 18.00 (12.83-<br>28.00) | 16.00 (11.00-<br>23.19) | 21.00 (15.00-<br>32.00) | <0.001                   |
| AST, U/L                     | 20.00 (16.00-<br>27.00) | 19.00 (15.00-<br>25.00) | 22.00 (17.00-<br>30.00) | <0.001                   |
| GGT, U/L                     | 27.00 (16.00-<br>47.00) | 21.00 (13.67-<br>38.25) | 33.00 (20.96-<br>55.14) | <0.001                   |
| UA, µmol/L                   | 296.84 ±97.80           | 283.74 ±94.62           | 310.52 ±99.24           | <0.001                   |

<sup>a</sup> Data are in n (%), means±SD or median (25th- 75th percentile), as appropriate.

<sup>b</sup> T test, Mann-Whitney test or chi-squared test

MAFLD, metabolic dysfunction-associated steatotic liver disease; NGT, normal glucose tolerance; IGR, impaired glucose regulation; T2DM, type 2 diabetes mellitus; BMI, body mass index; SBP, systolic blood pressure, DBP, diastolic blood pressure; WC, waist circumference; HbA1C, glycated hemoglobin; FBG, fasting blood glucose; 2hPBG, 2-hour postload blood glucose in oral glucose tolerance test; TC, total cholesterol; TG, triglyceride; HDL-c, high density lipoprotein cholesterol; LDL-c, low density lipoprotein cholesterol; ALT, alanine aminotransferase; AST, aspartate aminotransferase; GGT, gamma-glutamyl transferase; UA, uric acid

**Table S2. Stratified ORs (95% CIs) for MASLD according to frequency categories of fast eating**

|                                  |                        | ≤1 time/mo | ≤1 time/wk       | ≥2 times/wk      | P for trend | P for interaction |
|----------------------------------|------------------------|------------|------------------|------------------|-------------|-------------------|
| <b>Stratified by<sup>a</sup></b> |                        |            |                  |                  |             |                   |
| <b>Sex</b>                       |                        |            |                  |                  |             | <b>0.257</b>      |
|                                  | Men                    | Reference  | 1.15 (0.75-1.79) | 1.42 (0.84-2.40) | 0.179       |                   |
|                                  | Women                  | Reference  | 0.95 (0.58-1.57) | 2.25 (1.34-3.77) | 0.007       |                   |
| <b>Region</b>                    |                        |            |                  |                  |             | <b>0.213</b>      |
|                                  | South China            | Reference  | 0.88 (0.55-1.42) | 1.40 (0.81-2.41) | 0.419       |                   |
|                                  | North China            | Reference  | 1.40 (0.87-2.24) | 2.07 (1.24-3.44) | 0.004       |                   |
| <b>Smoking</b>                   |                        |            |                  |                  |             | <b>0.935</b>      |
|                                  | Non-smoker             | Reference  | 1.18 (0.79-1.75) | 1.80 (1.13-2.85) | 0.014       |                   |
|                                  | Smoker                 | Reference  | 0.95 (0.52-1.74) | 1.82 (1.01-3.31) | 0.082       |                   |
| <b>Glucose status</b>            |                        |            |                  |                  |             | <b>0.194</b>      |
|                                  | NGT                    | Reference  | 0.46 (0.14-1.56) | 1.75 (0.49-6.31) | 0.876       |                   |
|                                  | IGR                    | Reference  | 1.75 (0.80-3.83) | 3.82 (1.68-8.67) | 0.001       |                   |
|                                  | T2DM                   | Reference  | 0.92 (0.62-1.38) | 1.42 (0.90-2.24) | 0.241       |                   |
| <b>BMI</b>                       |                        |            |                  |                  |             | <b>0.248</b>      |
|                                  | < 25 kg/m <sup>2</sup> | Reference  | 1.20 (0.78-1.84) | 2.30 (1.41-3.76) | 0.002       |                   |
|                                  | ≥25 kg/m <sup>2</sup>  | Reference  | 0.90 (0.55-1.48) | 1.51 (0.89-2.56) | 0.219       |                   |

<sup>a</sup> Adjusted for age, sex, smoking status and drinking status, region, BMI, WC, HB1AC, FBG, TC, TG, HDL-c, LDL-c. ALT, AST, GGT, UA.

NGT, normal glucose tolerance; IGR, impaired glucose regulation; T2DM, type 2 diabetes mellitus; BMI, body mass index; WC, waist circumference; HbA1c, glycated hemoglobin; FBG, fasting blood glucose; 2hPBG, 2-hour postload blood glucose in oral glucose tolerance test; TC, total cholesterol; TG, triglyceride; HDL-c, high density lipoprotein cholesterol; LDL-c, low density lipoprotein cholesterol; ALT, alanine aminotransferase; AST, aspartate aminotransferase; GGT, gamma-glutamyl transferase; UA, uric acid.



**Table S3. Summary of the characteristics and results from included articles**

| Study               | Study Design         | Methods                                                    | Sample Size & population  | Age                                                             | Eating Speed Category                                                             | Reference       | Unadjusted OR                                            | Fairly Adjusted OR                                       | Additional Information                                           | Adjusted covariates                                                                               |
|---------------------|----------------------|------------------------------------------------------------|---------------------------|-----------------------------------------------------------------|-----------------------------------------------------------------------------------|-----------------|----------------------------------------------------------|----------------------------------------------------------|------------------------------------------------------------------|---------------------------------------------------------------------------------------------------|
| *Nishi, et al, 2016 | Retrospective Cohort | Self-reported Eating Speed; NAFLD: FLI scores $\geq 60$    | n= 2,254 Japanese adults  | 48.0 $\pm$ 10.0                                                 | Fast                                                                              | Slow/moderate   | 1.58 (0.90-2.77)                                         | 1.33 (0.74-2.37)                                         | NA                                                               | Sex, age, smoking, physical activities, metabolic status, prefecture.                             |
| *Lee, et al, 2016   | Cross-sectional      | Self-reported Eating Speed; NAFLD: Sonographic examination | n= 7,917 Korean adults    | 46.3 $\pm$ 12.9 (Normal group)<br>52.1 $\pm$ 11.9 (NAFLD group) | 10 $\leq$ and <15 min;<br>5 $\leq$ and <10 min;<br><5 min                         | > 15 min        | 1.36 (1.17-1.59)<br>2.06 (1.77-2.39)<br>3.01 (2.44-3.71) | 1.12 (0.87-1.43)<br>1.42 (1.11-1.81)<br>1.81 (1.24-2.63) | More pronounced effect found in the subgroup with BMI < 25 kg/m2 | Sex, age, BMI, total energy intake, smoking, physical activity, biochemical measurements          |
| *Cao, et al. 2020   | Cross-sectional      | Self-reported Eating Speed; NAFLD: Sonographic examination | n = 23,611 Chinese adults | 38.6 $\pm$ 1.33 (Normal group)<br>42.3 $\pm$ 1.32 (NAFLD group) | Medium (16-20 min);<br>Relatively fast (11-15 min);<br>Very fast ( $\leq$ 10 min) | Slow (> 20 min) | 1.52 (1.31-1.77)<br>2.09 (1.80-2.42)<br>2.65 (2.25-3.23) | 1.06 (0.89-1.28)<br>1.08 (0.90-1.31)<br>1.04 (0.84-1.28) | NA                                                               | Sex, age, BMI, total energy intake, smoking, drinking, socioeconomic status, depressive symptoms, |

|                              |                 |                                                            |                                                   |                                                       |                |           |                                      |                                                  |                                            |                                                                      |
|------------------------------|-----------------|------------------------------------------------------------|---------------------------------------------------|-------------------------------------------------------|----------------|-----------|--------------------------------------|--------------------------------------------------|--------------------------------------------|----------------------------------------------------------------------|
|                              |                 |                                                            |                                                   |                                                       |                |           |                                      |                                                  |                                            | sleeping status,<br>dietary patterns                                 |
| *Iwai, et al. 2023           | Cross-sectional | Self-reported Eating Speed; NAFLD: L/S attenuation         | n = 450 Japanese adults                           | 55 (45-62) (Normal group)<br>56 (45-69) (NAFLD group) | Fast           | Not Fast  | 1.785 (1.036-3.075)                  | 1.231 (0.649-2.336)                              | NA                                         | Sex, age, BMI, chewing status, biochemical measurements              |
| Takahashi, et al. 2020       | Cross-sectional | Self-reported Eating Speed; NAFLD: Sonographic examination | n = 308 Japanese type 2 diabetes patients         | 66.8±10.6                                             | Moderate; Fast | Slow      | 2.10 (0.97–4.54)<br>2.64 (1.25–5.56) | 1.42 (0.59–3.44)<br>2.10 (0.90–4.91)             | More pronounced effect found in male group | Sex, age, energy intake, smoking, exercise, biochemical measurements |
| Hsieh, et al. 2011           | Cross-sectional | Self-reported Eating Speed; NAFLD: Sonographic examination | n = 8240 men<br>n = 2955 women<br>Japanese adults | 51.6±9.4 (Men)<br>52.9±10.1 (Women)                   | Rapid          | Not rapid | NA                                   | Men: 1.69 (1.52-1.88)<br>Women: 1.62 (1.24-2.10) | NA                                         | Age                                                                  |
| Mansour-Ghanaei, et al. 2019 | Cross-sectional | Self-reported Eating Speed; NAFLD: Sonographic examination | n = 630 Iranian adults                            | 46.99 ± 7.33                                          | Fast           | Not Fast  | 1.40 (1.02-1.92)                     | NA                                               | NA                                         | NA                                                                   |

---

\*included in the meta-analysis

**Table S4. Quality Assessment of the Studies by Newcastle-Ottawa Scale (NOS)**

|                           | Retrospective Cohort |                        | Cross-sectional  |                  |                   |                    |                             |          |
|---------------------------|----------------------|------------------------|------------------|------------------|-------------------|--------------------|-----------------------------|----------|
|                           | Nishi, 2016, Japan   | Takahashi, 2020, Japan | Lee, 2016, Korea | Cao, 2020, China | Iwai, 2023, Japan | Hsieh, 2011, Japan | Mansour-Ghanaei, 2019, Iran |          |
| <b>s</b>                  | <b>1</b>             | 1                      | 1                | 1                | 1                 | 1                  | 1                           |          |
|                           | <b>2</b>             | 1                      | 1                | 1                | 1                 | 1                  | 1                           |          |
|                           | <b>3</b>             | 1                      | 0                | 1                | 1                 | 1                  | 1                           |          |
|                           | <b>4</b>             | 0                      | 1                | 1                | 1                 | 1                  | 1                           |          |
| <b>Comparability</b>      | <b>1</b>             | 2                      | 2                | 2                | 2                 | 1                  | 0                           |          |
| <b>Exposure</b>           | <b>1</b>             | 0                      | 1                | 1                | 1                 | 1                  | 1                           |          |
|                           | <b>2</b>             | 1                      | 1                | 1                | 1                 | 1                  | 1                           |          |
|                           | <b>3</b>             | 0                      | 0                | 0                | 0                 | 0                  | 0                           |          |
| <b>Total Points</b>       |                      | 6                      | 7                | 8                | 8                 | 7                  | 6                           |          |
| <b>Quality Evaluation</b> |                      | Moderate               | Moderate         | High             | High              | High               | Moderate                    | Moderate |



---

**Table S5. Quality Assessment of 6 cross-sectional studies the Agency for Healthcare Research and Quality (AHRQ) scale**

---

|                               | Takahashi, 2020,<br>Japan | Lee, 2016,<br>Korea | Cao, 2020,<br>China | Iwai, 2023,<br>Japan | Hsieh, 2011,<br>Japan | Mansour-Ghanaei, 2019,<br>Iran |
|-------------------------------|---------------------------|---------------------|---------------------|----------------------|-----------------------|--------------------------------|
| <b>1</b>                      | 1                         | 1                   | 1                   | 1                    | 1                     | 1                              |
| <b>2</b>                      | 1                         | 1                   | 1                   | 1                    | 1                     | 1                              |
| <b>3</b>                      | 1                         | 1                   | 1                   | 1                    | 1                     | 1                              |
| <b>4</b>                      | 1                         | 1                   | 1                   | 1                    | 1                     | 1                              |
| <b>5</b>                      | 1                         | 1                   | 1                   | 1                    | 1                     | 1                              |
| <b>6</b>                      | 0                         | 1                   | 1                   | 1                    | 1                     | 0                              |
| <b>7</b>                      | 1                         | 1                   | 1                   | 1                    | 1                     | 1                              |
| <b>8</b>                      | 1                         | 1                   | 1                   | 1                    | 1                     | 0                              |
| <b>9</b>                      | 0                         | 1                   | 1                   | 0                    | 0                     | 0                              |
| <b>10</b>                     | 0                         | 0                   | 0                   | 0                    | 0                     | 0                              |
| <b>11</b>                     | 0                         | 0                   | 0                   | 0                    | 0                     | 0                              |
| <b>Total Points</b>           | 7                         | 9                   | 9                   | 8                    | 8                     | 6                              |
| <b>Quality<br/>Evaluation</b> | Moderate                  | High                | High                | High                 | High                  | Moderate                       |

---

---

## SUPPLEMENTARY FIGURES

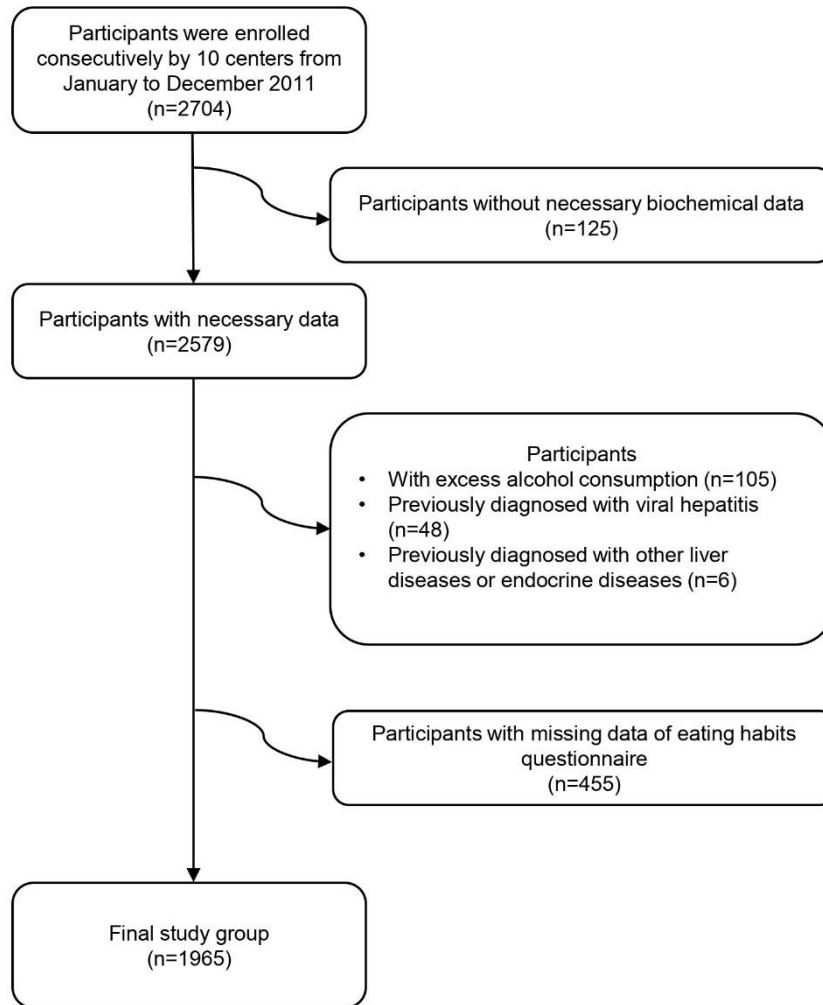

**Fig. S1** - Flow diagram of study patients

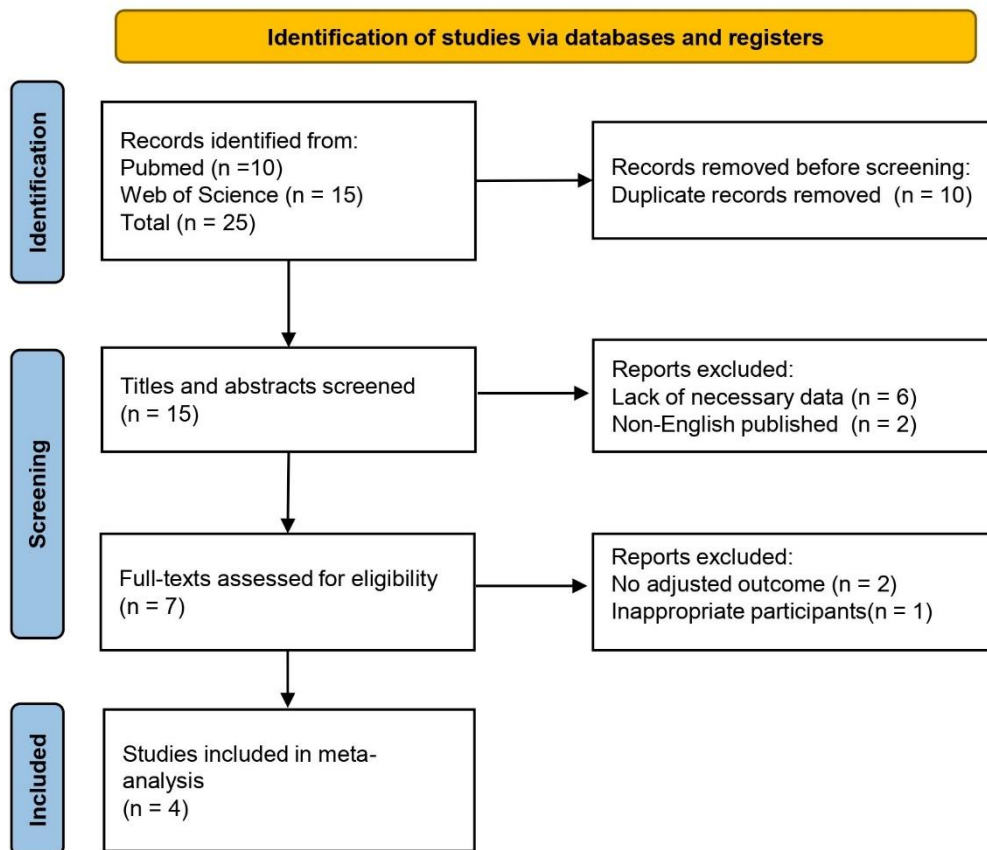

**Fig. S2** - Flow diagram outlining the selection of studies included in the meta-analysis

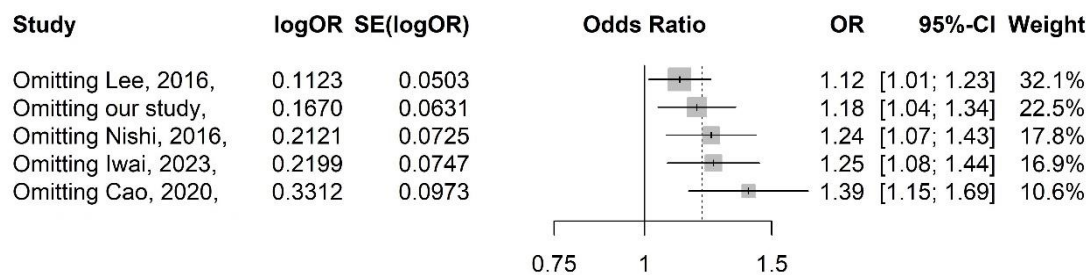

**Fig. S3** - Forest plot for the leave-one-out sensitivity analysis of the meta-analysis.
